# Supplementary material
Source: PubMed Central journal article supplement (PMC5679421)

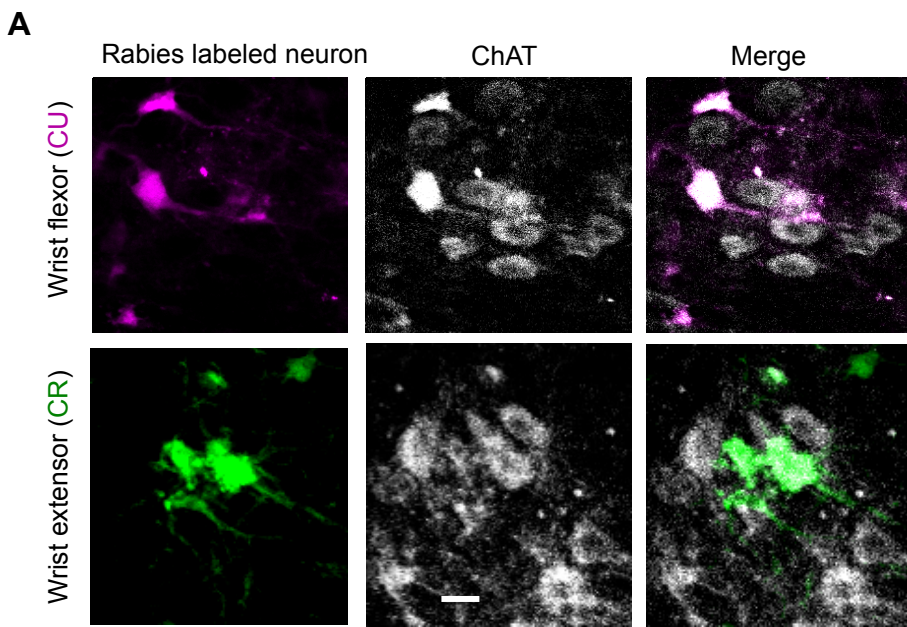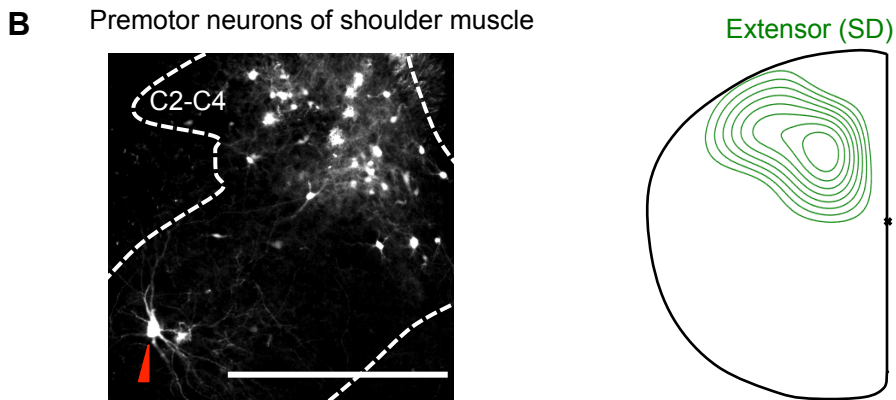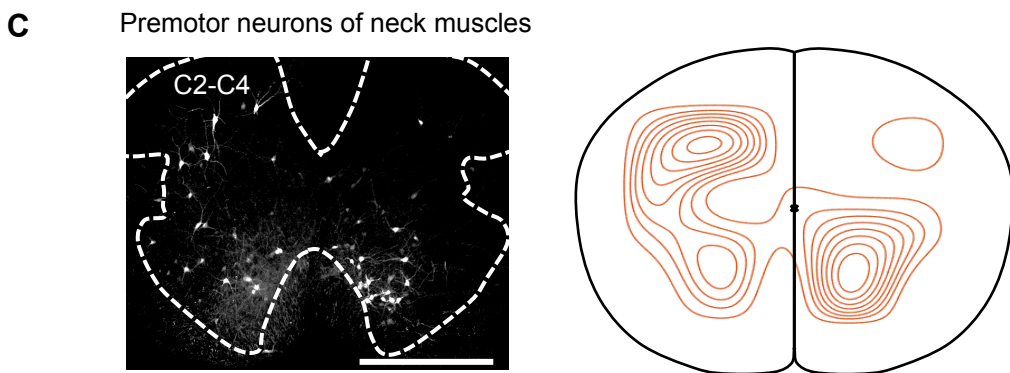

Overlapping between shoulder / neck premotor neuron distribution and region-specific CST termination

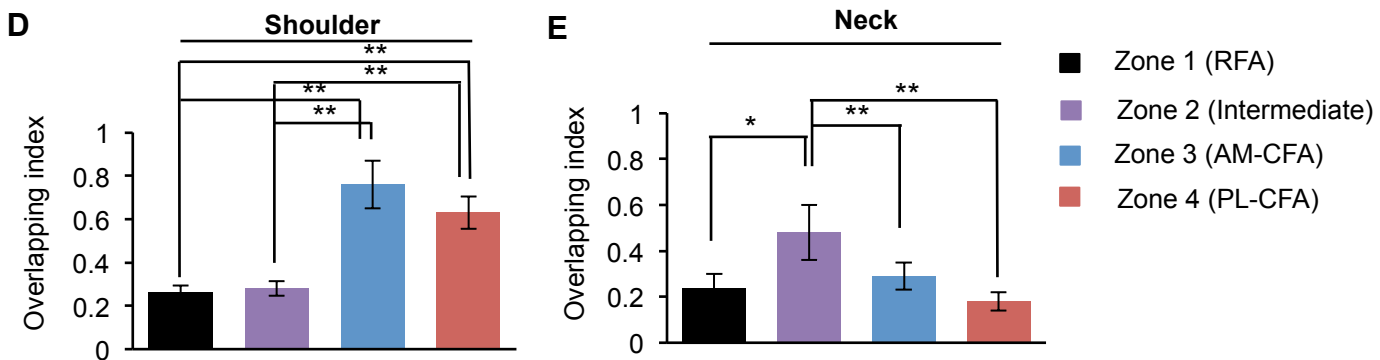

Supplement: NIHMS899877-supplement-5.pdf [file NIHMS899877-supplement-5.pdf]
