# Supplementary material
Source: PubMed Central journal article supplement (PMC5679421)
Supplement: NIHMS899877-supplement-9.pdf [file NIHMS899877-supplement-9.pdf]

**Supplementary Table 1 Topographical mapping of optogenetic stimulation of CSNs or layer 5 pyramidal neurons induced joint movement, Related to Figure 4**

| <b>Steps during skilled reaching</b> | <b>Joint Movements</b>             | <b>CSNs optogenetic stimulation</b> | <b>Thy1-ChR2-YFP optogenetic stimulation</b> | <b>CSNs regional ablation</b> |
|--------------------------------------|------------------------------------|-------------------------------------|----------------------------------------------|-------------------------------|
| Digits to midline                    | Elbow flexion                      | Anterior-medial (A-M) CFA           | Both RFA & CFA                               | Slightly impaired in CFA      |
| Digits semi-flexed                   | Slight digits flexion              | No                                  | No                                           | No effect                     |
| Aim & Advance                        | Elbow extension & adduction        | Posterior-lateral (P-L) & A-M CFA   | Both RFA & CFA                               | Impaired in CFA               |
| Digits extended                      | Digits extension                   | No                                  | CFA                                          | No effect                     |
| Pronation                            | Elbow abduction                    | No                                  | No                                           | Impaired in both RFA and CFA  |
|                                      | Wrist rotational movement          | No                                  | No                                           |                               |
| Grasp                                | Digits closure                     | RFA                                 | RFA                                          | Impaired in RFA               |
| Supination I                         | Wrist supination                   | RFA                                 | RFA                                          | Impaired in RFA               |
| Supination II & Retrieval            | Wrist supination                   | RFA                                 | RFA                                          | Impaired in RFA               |
|                                      | Shoulder extension & Elbow flexion | A-M & P-L CFA                       | Both RFA& CFA                                | Impaired in CFA (slow)        |
| Release                              | Digits extension                   | No                                  | CFA                                          | No effect                     |
