# Supplementary material
Source: PubMed Central journal article supplement (PMC5679421)

3D stacked whole-brain image

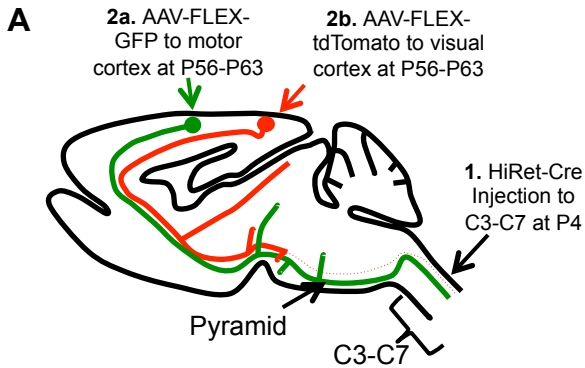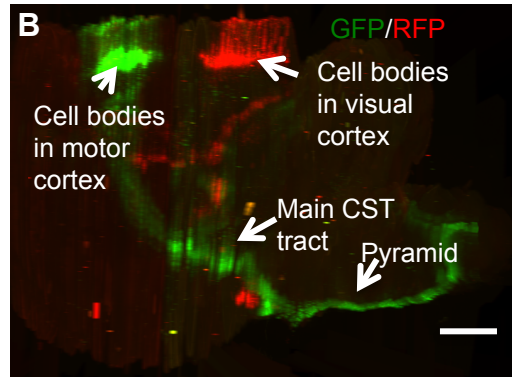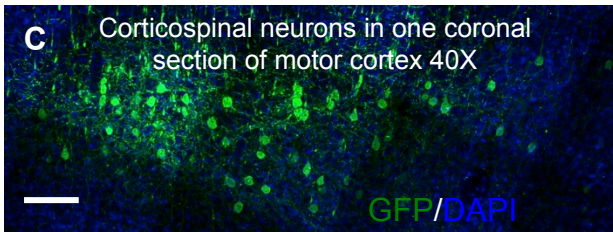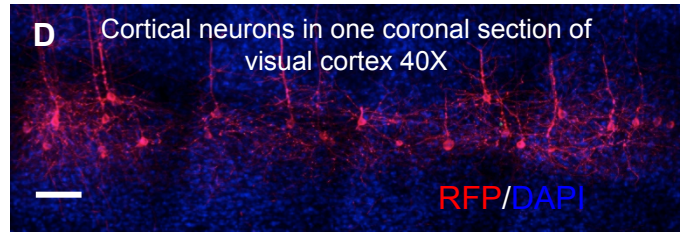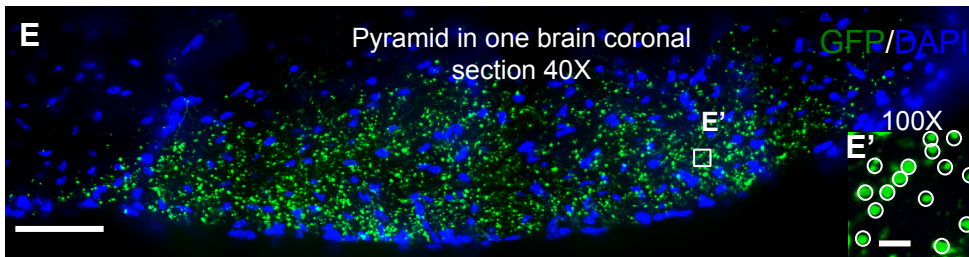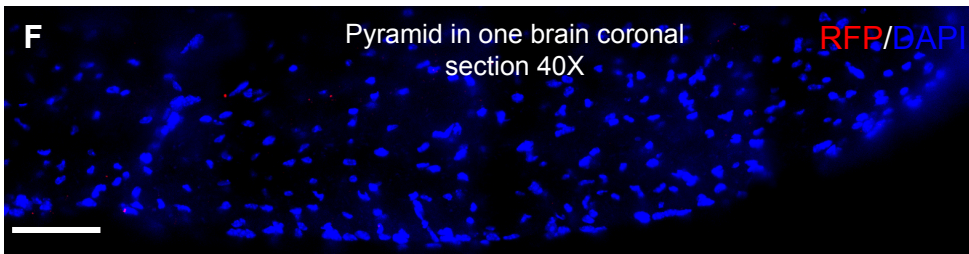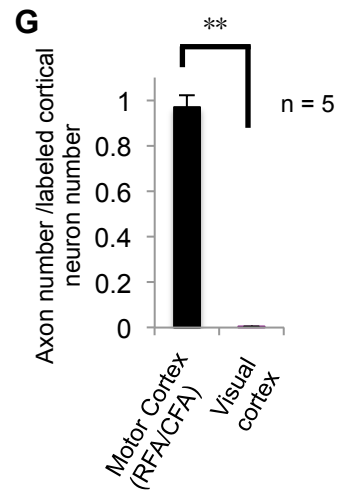

Supplement: NIHMS899877-supplement-1.pdf [file NIHMS899877-supplement-1.pdf]

A

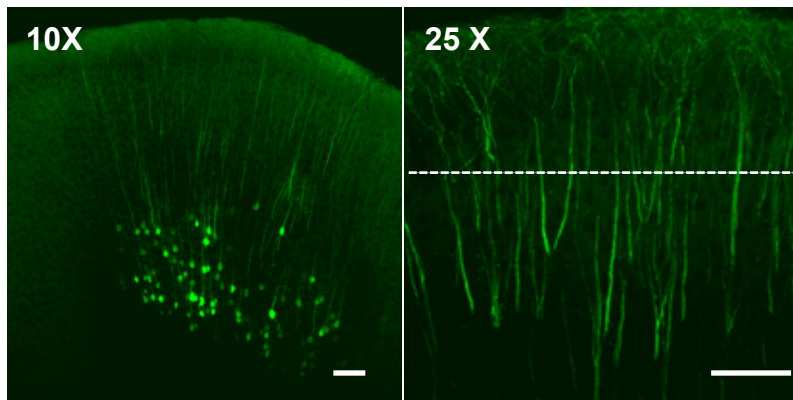

B

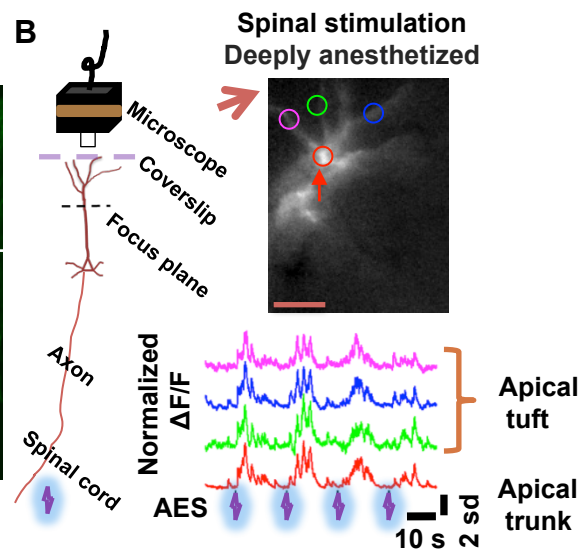

C

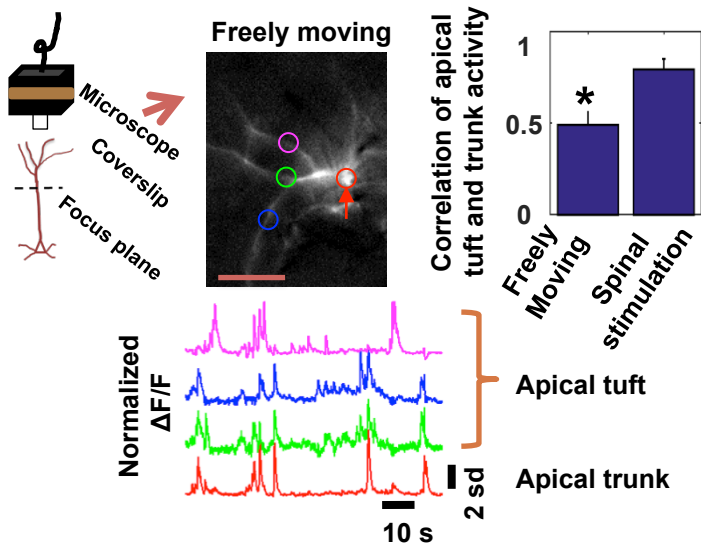

D

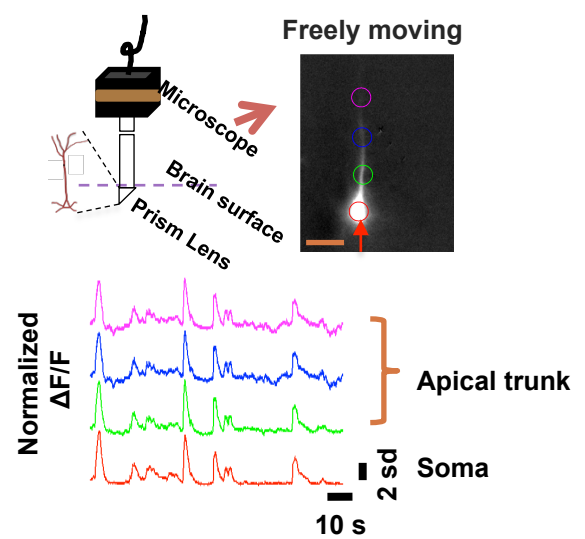

AP: 1.5 ML: 1.2

AP: 0.7 ML: 1.8

AP: -0.3 ML: 3.0

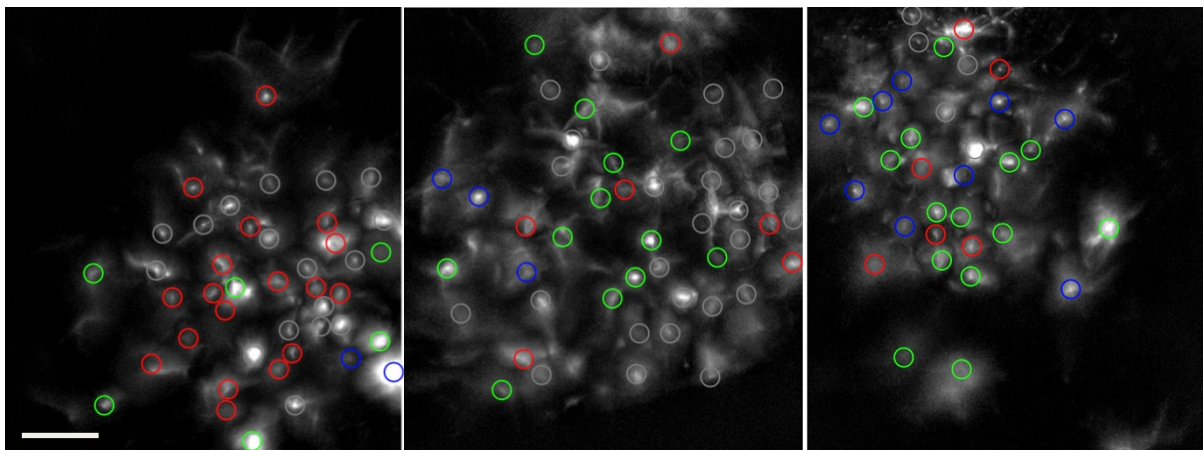

E

Supplement: NIHMS899877-supplement-2.pdf [file NIHMS899877-supplement-2.pdf]

## Total CSNs ablation

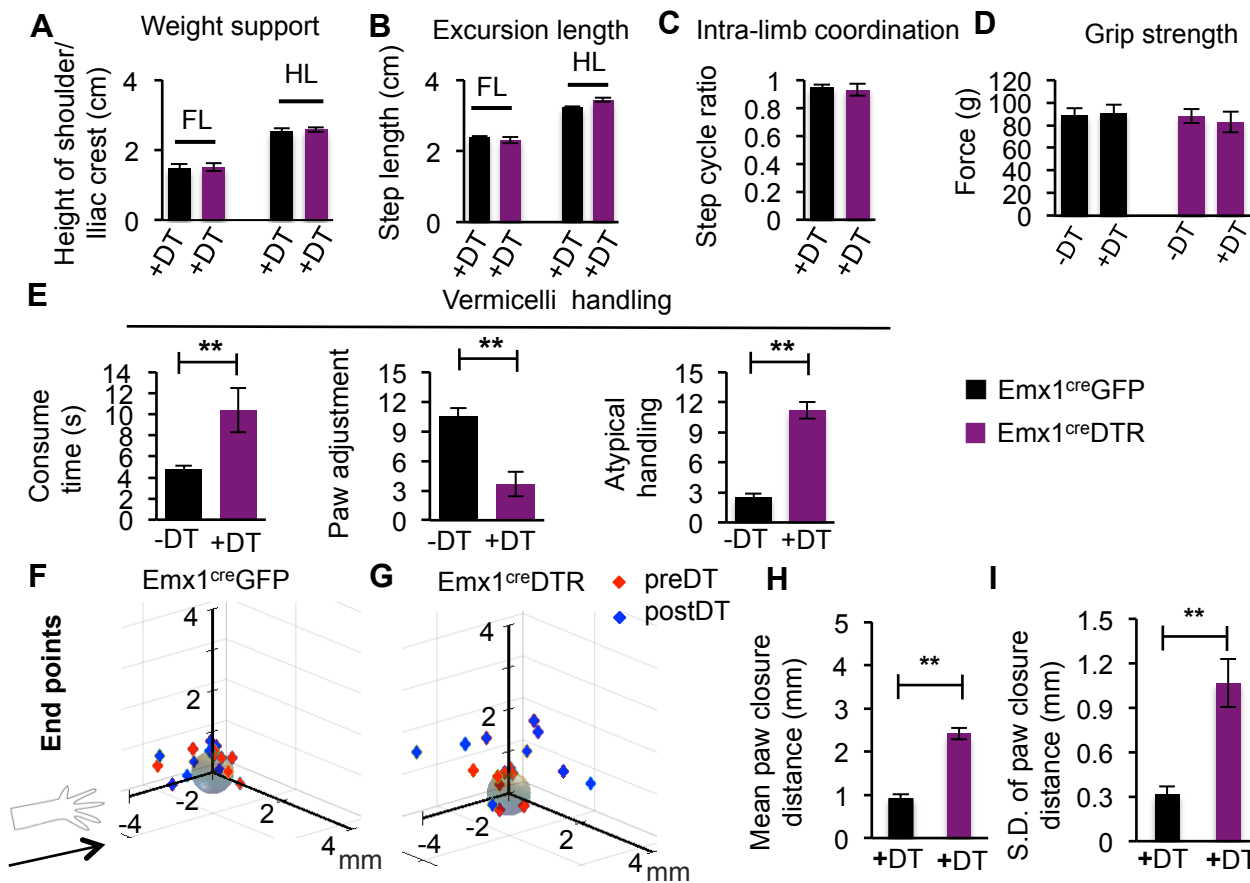

## Regional CSNs ablation

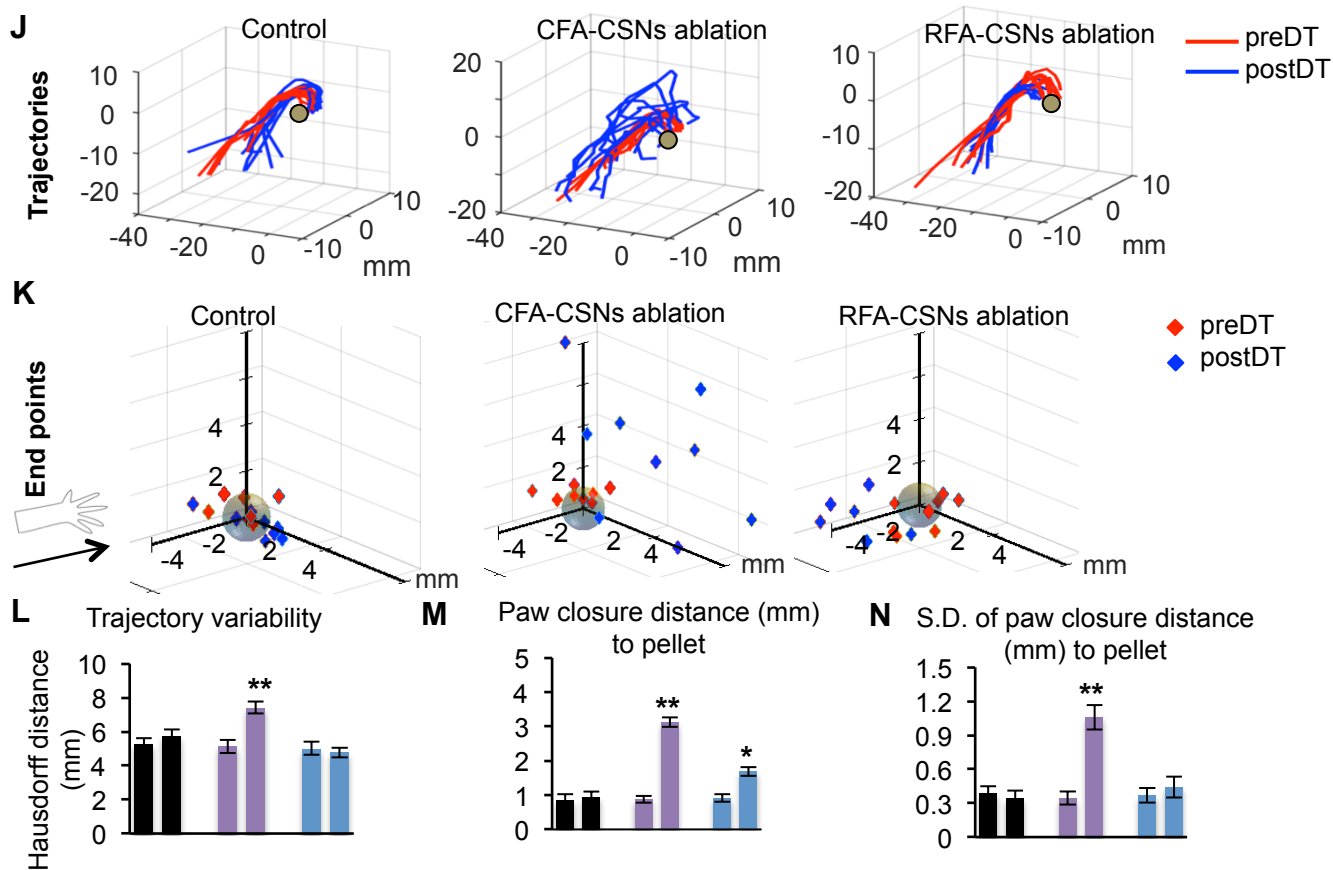

Supplement: NIHMS899877-supplement-3.pdf [file NIHMS899877-supplement-3.pdf]

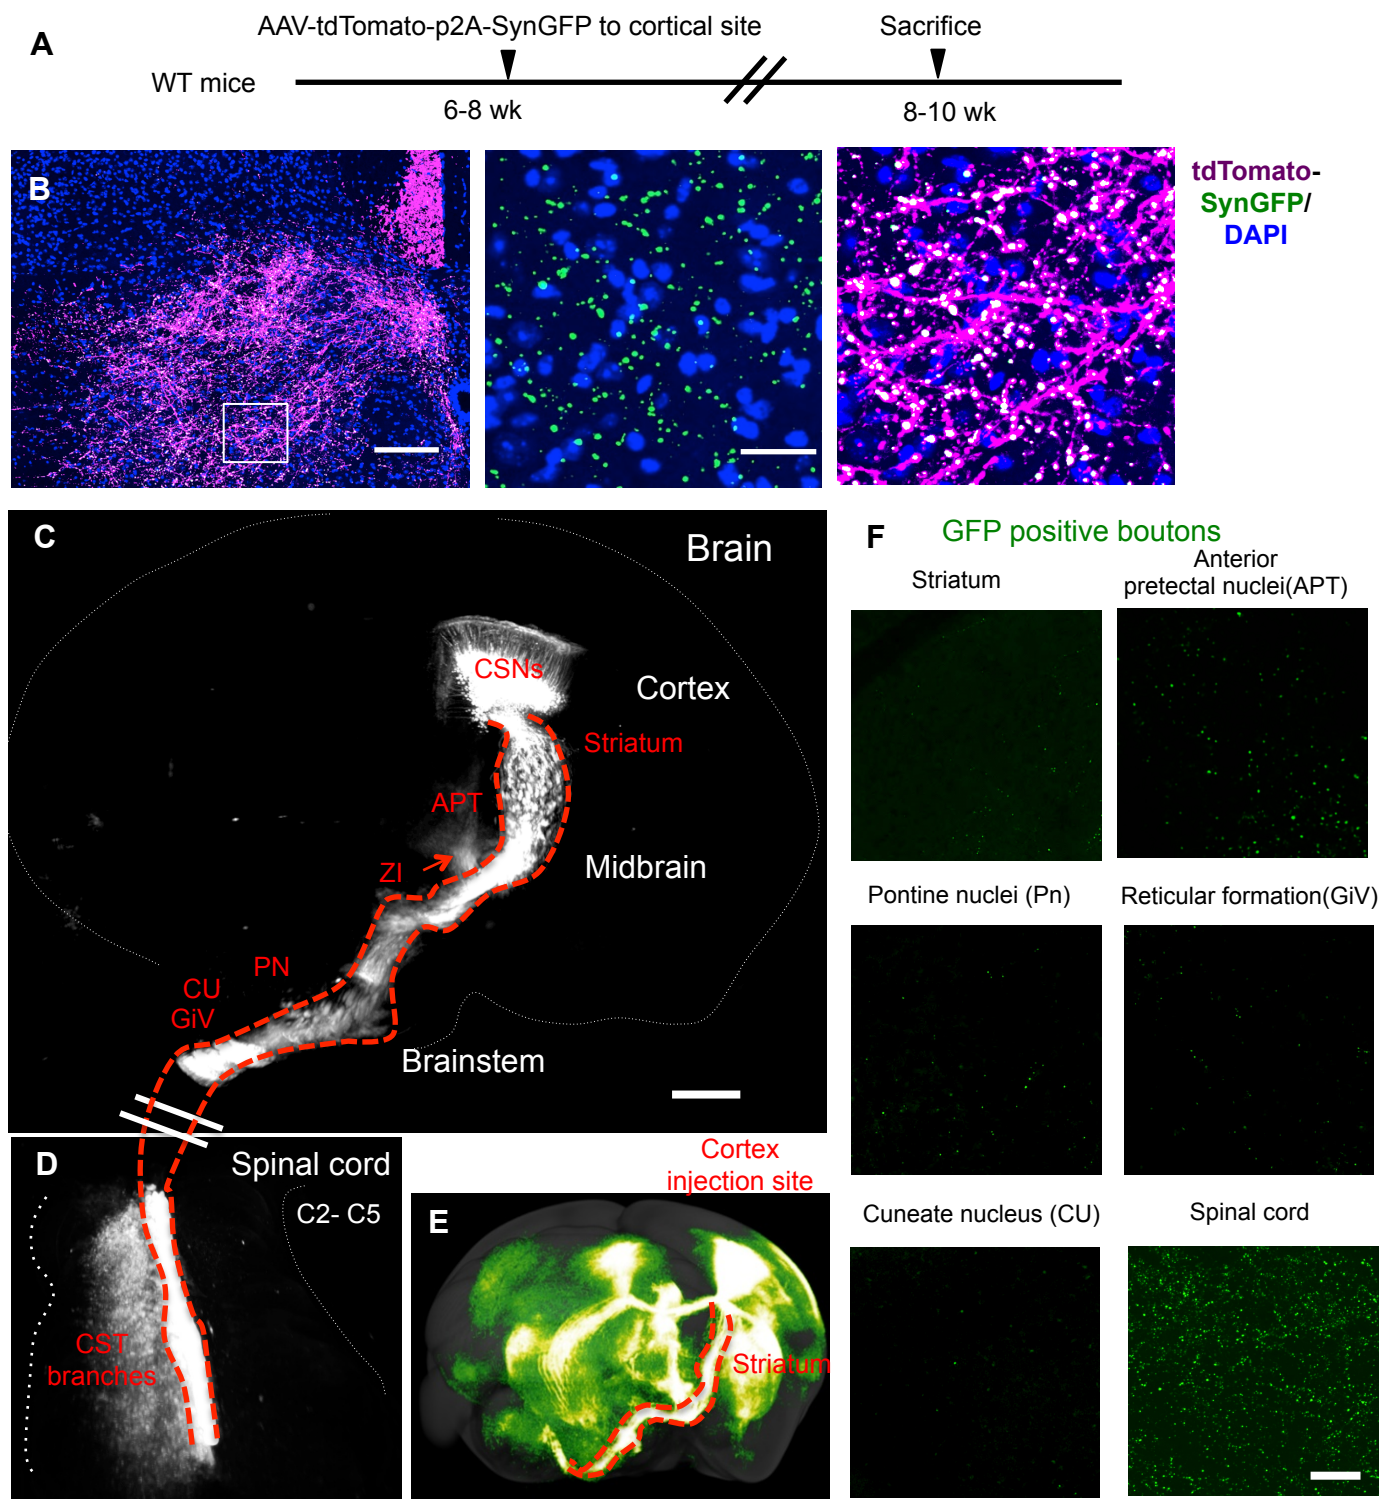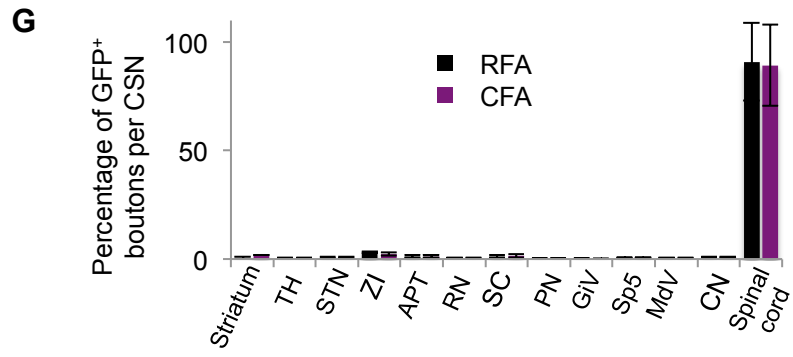

Supplement: NIHMS899877-supplement-4.pdf [file NIHMS899877-supplement-4.pdf]

**A**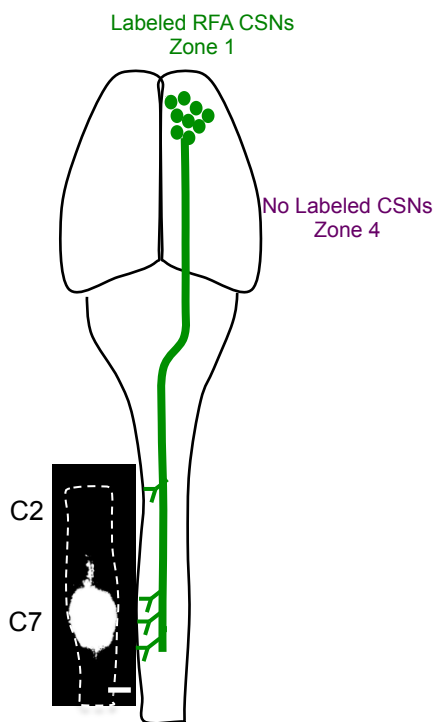**B**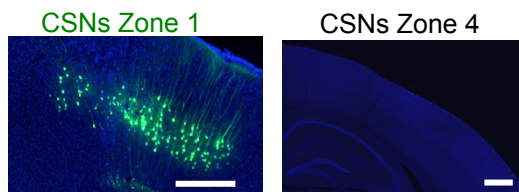**C**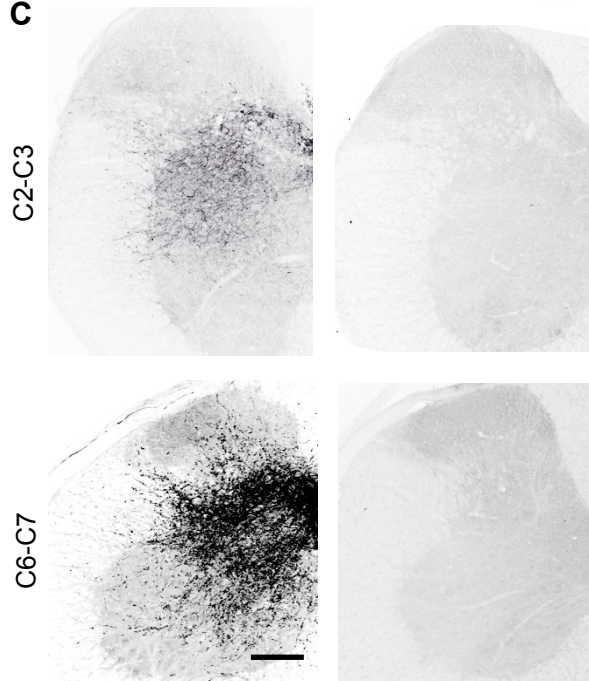**D**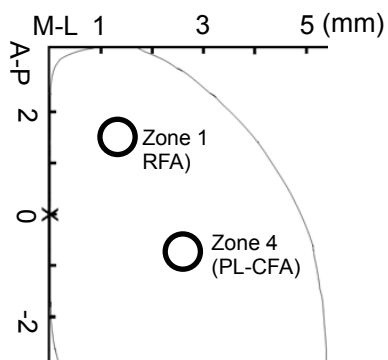**E**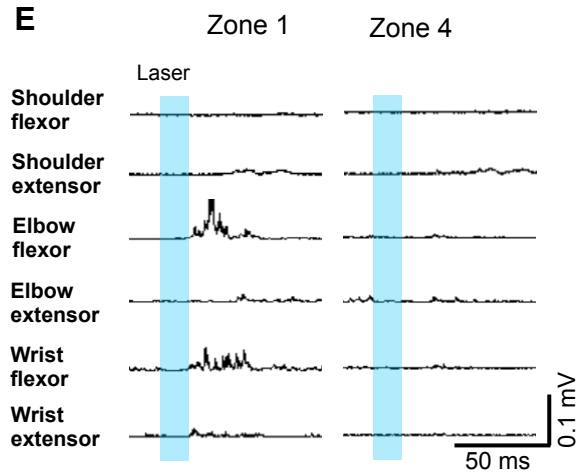**F**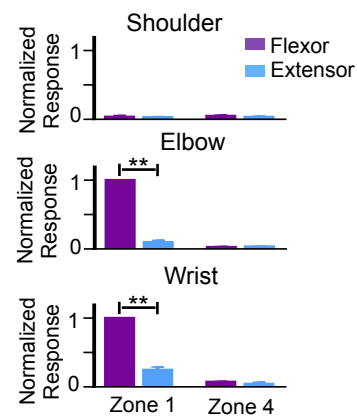

Supplement: NIHMS899877-supplement-6.pdf [file NIHMS899877-supplement-6.pdf]

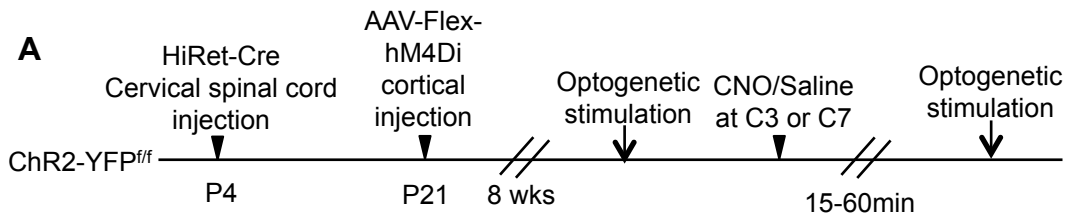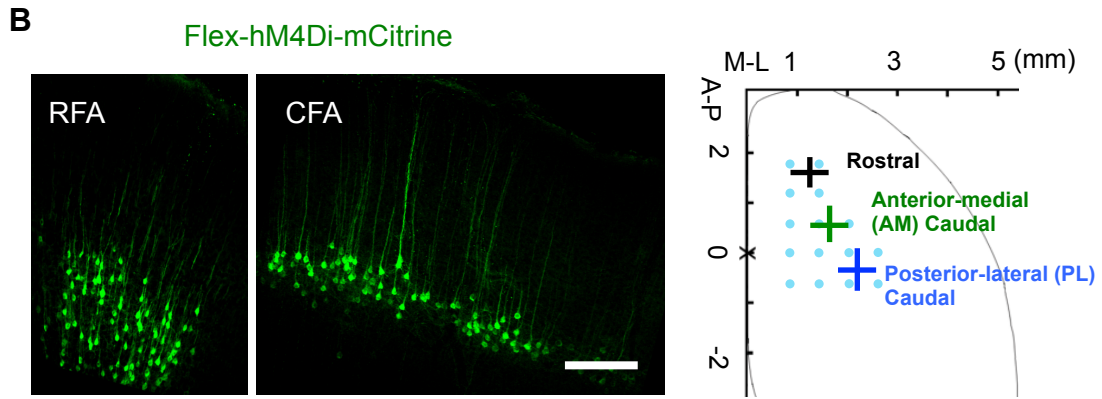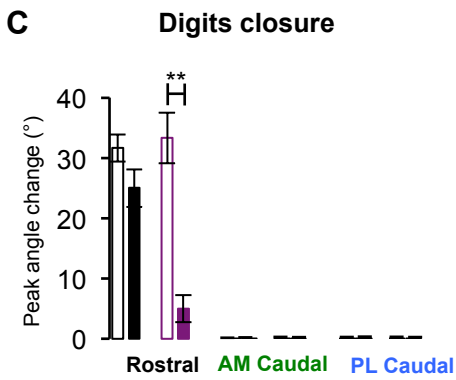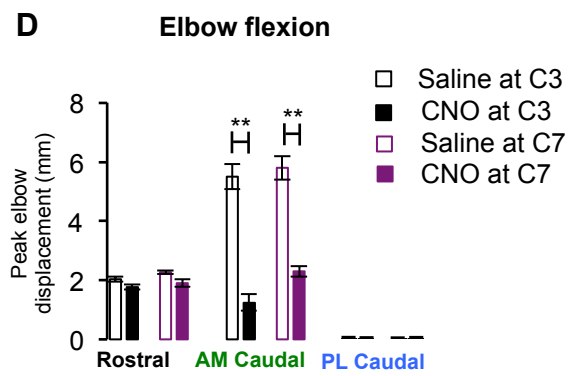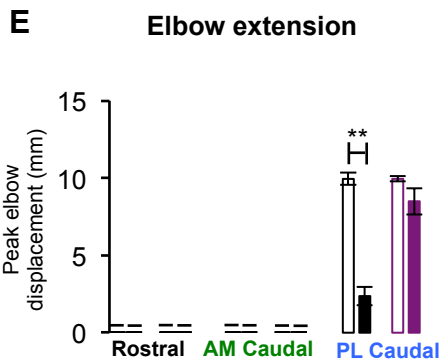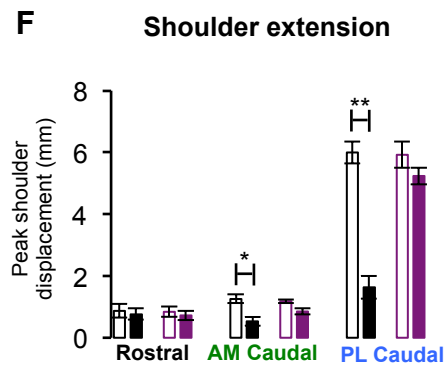

Supplement: NIHMS899877-supplement-7.pdf [file NIHMS899877-supplement-7.pdf]
